# Supplementary material
Source: PubMed Central journal article supplement (PMC2700530)
Supplement: tpc.108.062935_1.pdf [file tpc.108.062935_1.pdf]

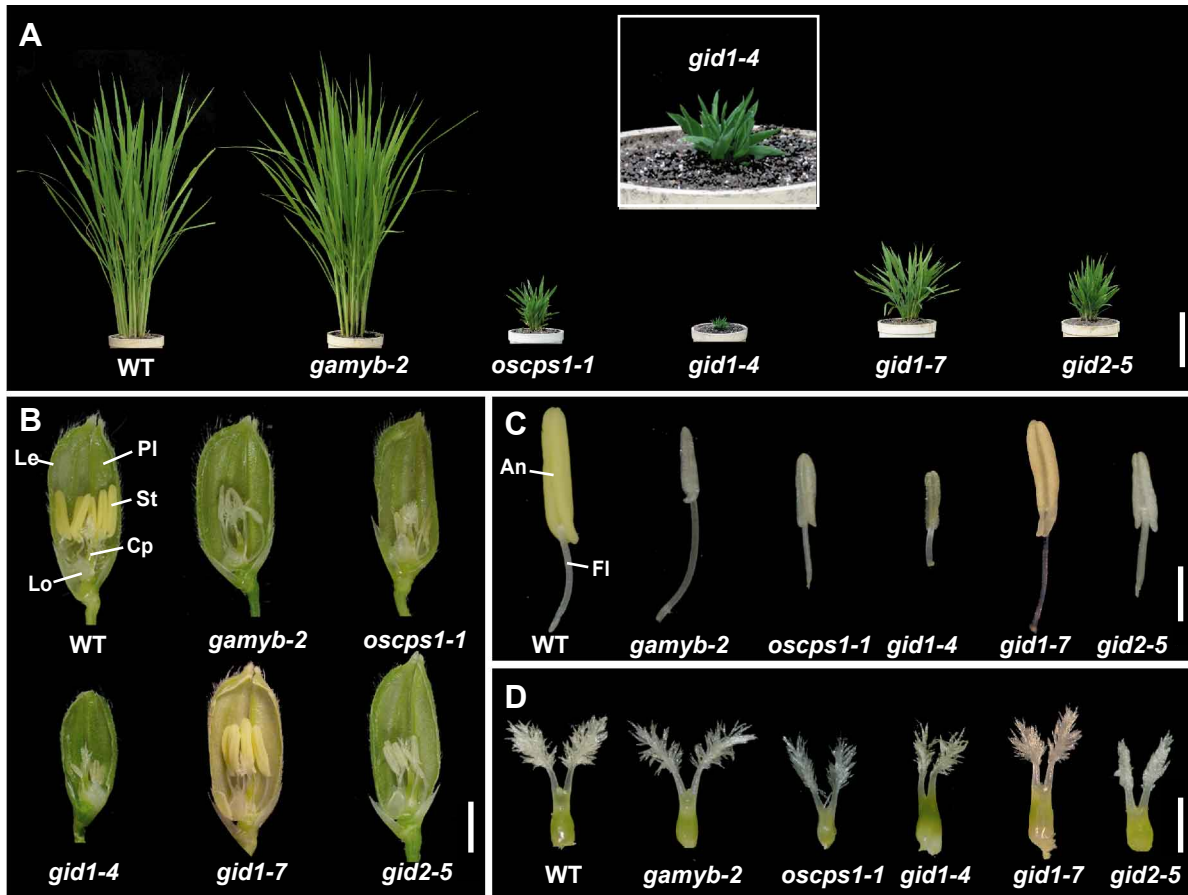

**Supplemental Figure 1.** Phenotypic Analysis of Reproductive Organs in WT and GA-Related Mutants.

(A) Gross morphology of WT, *gamyb-2*, and GA-related mutants (*oscps1-1*, *gid1-4*, *gid1-7*, and *gid2-5*) at 2 months after sowing. Bar = 20 cm.

(B) Flowers of the WT, *gamyb-2*, and GA-related mutants.

Cp, carpel; Le, lemma; Lo, lodicule; PI, palea; St, stamen. Bar = 2 mm.

(C) Stamens of the WT, *gamyb-2*, and GA-related mutants. An, anther; FI, filament. Bar = 1 mm.

(D) Pistils of the WT, *gamyb-2*, and GA-related mutants. Bar = 1 mm.

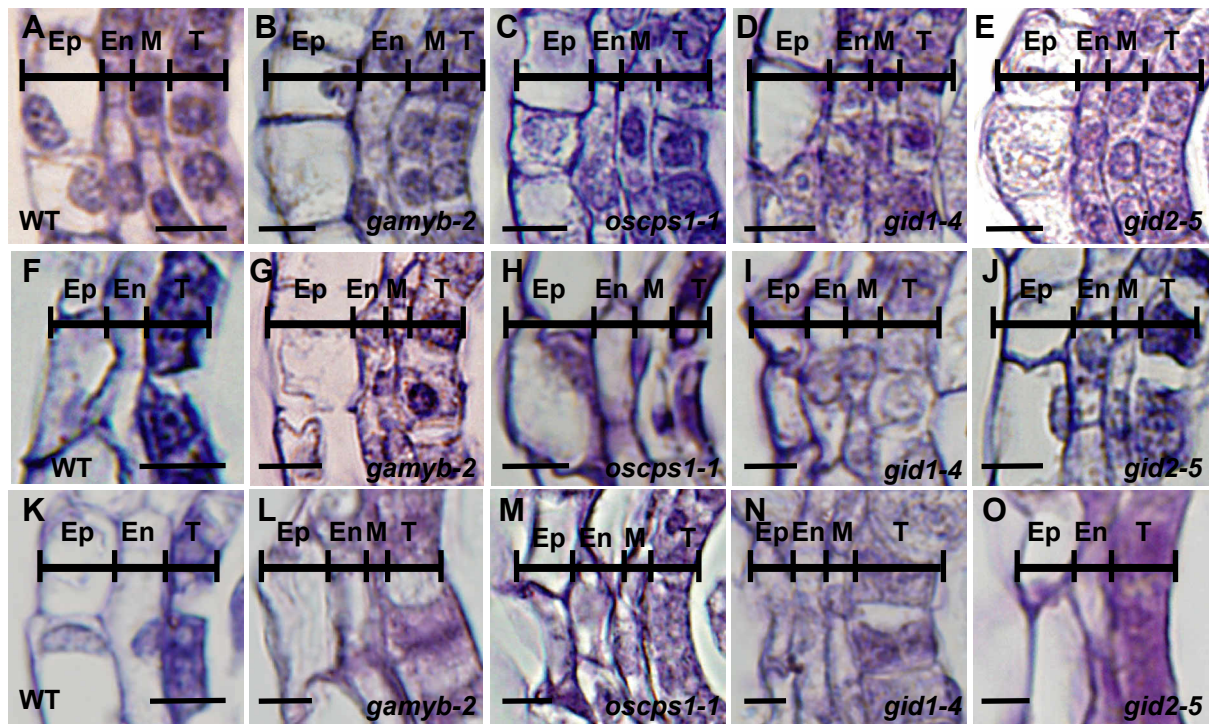

**Supplemental Figure 2.** Higher Magnification of Transverse Section from WT and GA-Related Mutants.

Anther development in WT and GA-related mutants was compared at the three different stages: pollen mother cell (PMC), meiosis (MEI), and tetrad (TD).

**(A) to (E)** Transverse section of anthers at the PMC stage in WT **(A)**, *gamyb-2* **(B)**, *oscps1-1* **(C)**, *gid1-4* **(D)**, and *gid2-5* **(E)**.

**(F) to (J)** Transverse section of anthers at the MEI stage in WT **(F)**, *gamyb-2* **(G)**, *oscps1-1* **(H)**, *gid1-4* **(I)**, and *gid2-5* **(J)**.

**(K) to (O)** Transverse section of anthers at the TD stage in WT **(K)**, *gamyb-2* **(L)**, *oscps1-1* **(M)**, *gid1-4* **(N)** and *gid2-5* **(O)**.

Ep, epidermal cell layer; En, endothelial cell layer; M, middle layer; T, tapetal layer. Bars = 5  $\mu$ m.

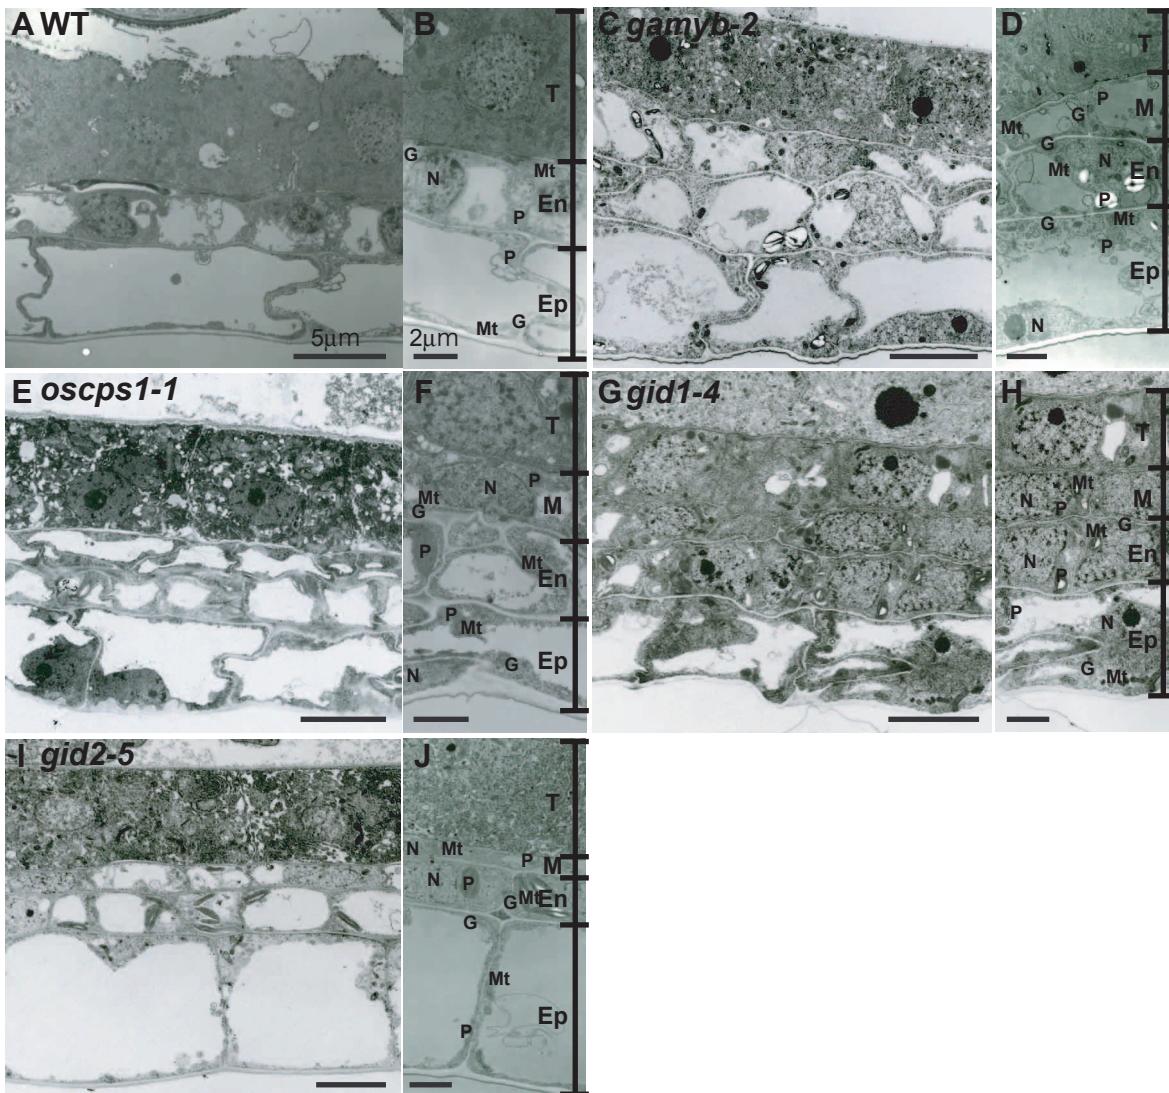

**Supplemental Figure 3.** Ultrastructural Analysis of the Anther Wall Layers in WT and GA-Related Mutants by TEM.

(A) to (F), (I) and (J) The anther wall layers at the YM stage in WT ([A] and [B]), *gamyb-2* ([C] and [D]), *oscps1-1* ([E] and [F]), and *gid2-5* ([I] and [J]).

(G) and (H) The anther wall layers at the MEI stage in *gid1-4*.

(B), (D), (F), (H), and (J) Higher Magnification for each anther layers with indications of cellular organs. N, nucleus; P, plastid; Mt, mitochondria; G, Golgi body; Ep, epidermal cell layer; En, endothelial cell layer; M, middle layer; T, tapetal layer.



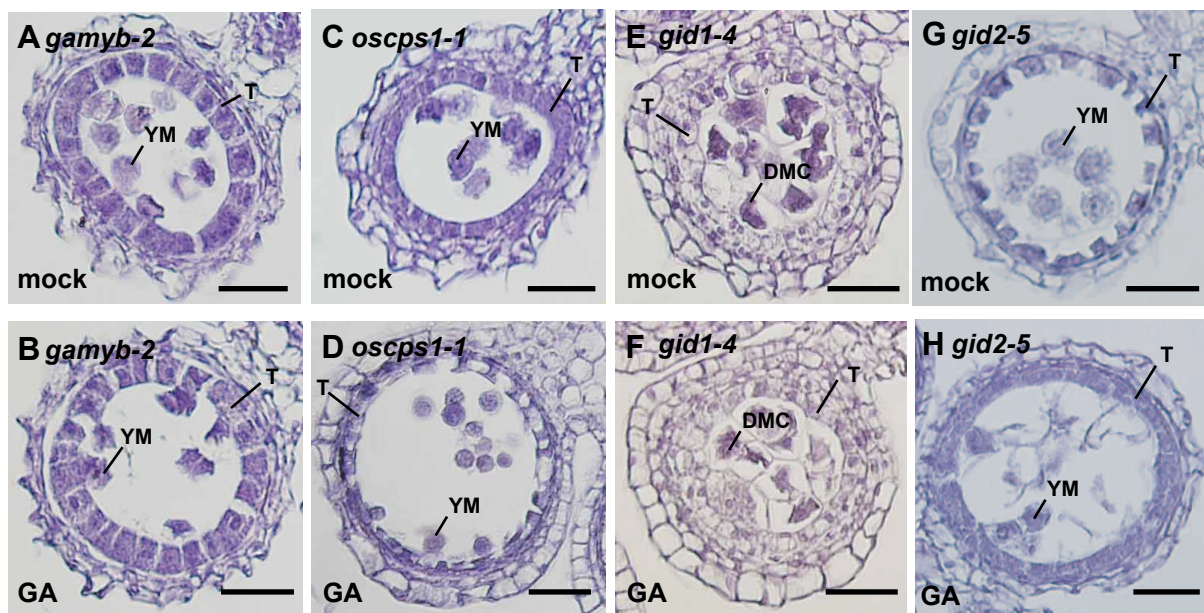

**Supplemental Figure 4.** Histological Analyses of GA<sub>3</sub>-Treated Anthers in GA-Related Mutants.

**(A)** and **(B)** Transverse section of anther at the YM stage in *gamyb-2*, treated by mock (0.1 % ethanol) **(A)** or 10<sup>-5</sup> M GA<sub>3</sub> **(B)**.

**(C)** and **(D)** Transverse section of anther at the YM stage in *oscps1-1*, treated by mock (0.1 % ethanol) **(C)** or 10<sup>-5</sup> M GA<sub>3</sub> **(D)**.

**(E)** and **(F)** Transverse section of anther at the TD stage in *gid1-4*, treated by mock (0.1 % ethanol) **(E)** or 10<sup>-5</sup> M GA<sub>3</sub> **(F)**.

**(G)** and **(H)** Transverse section of anther at the YM stage in *gid2-5*, treated by mock (0.1 % ethanol) **(G)** or 10<sup>-5</sup> M GA<sub>3</sub> **(H)**.

YM, young microspore; T, tapetal layer; DMC, degraded meiocyte. Bars = 25 μm.

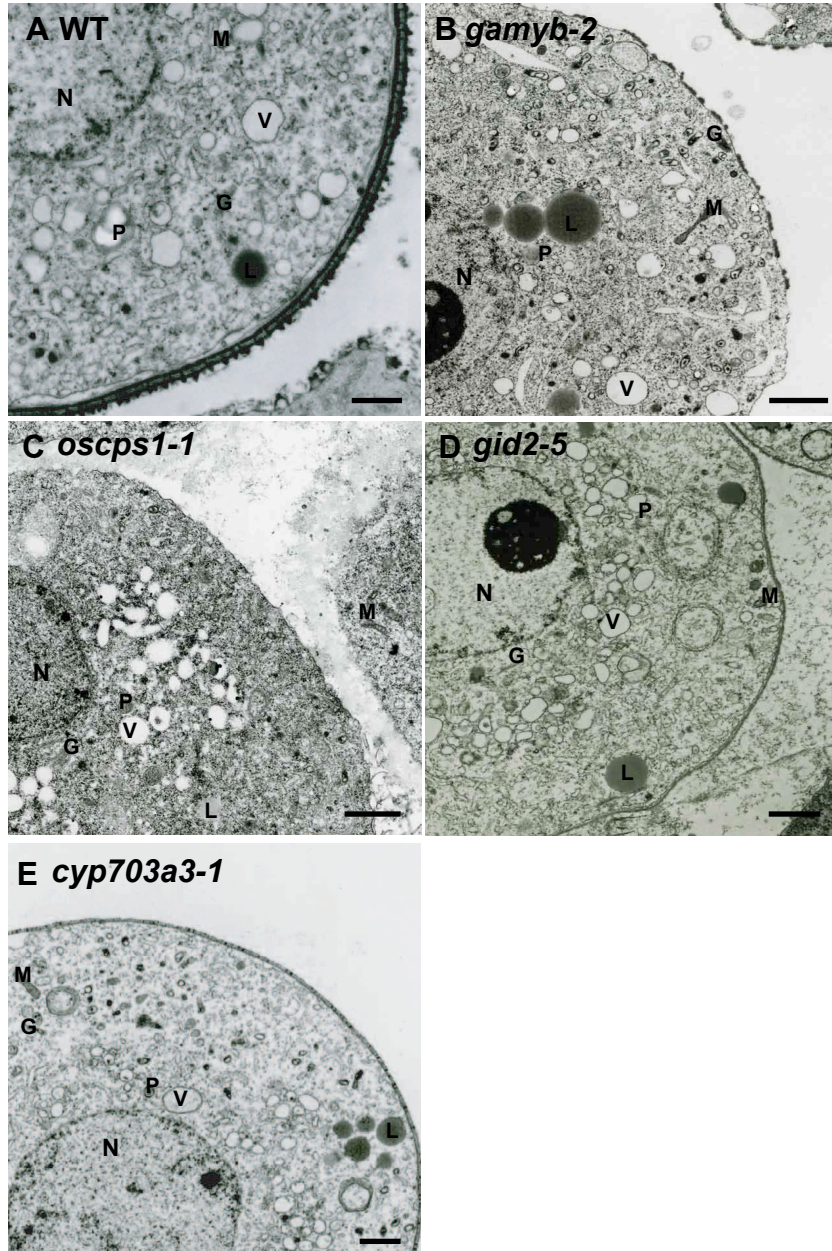

**Supplemental Figure 5.** The cytoplasm of Microspores in WT, GA-Related Mutants, and *cyp703a3-1* by TEM.

(A) to (E) Ultrastructure of the cytoplasm in WT (A), *gamyb-2* (B), *oscps1-1* (C), *gid2-5* (D), and *cyp703a3-1* (E). N, nucleus; P, plastid; M, mitochondria; G, Golgi body; V, vacuole; L, lipid body. Bars = 1  $\mu$ m.

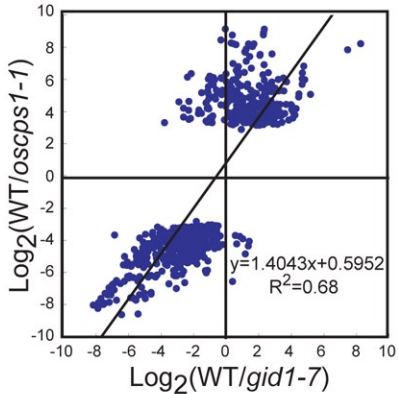

**Supplemental Figure 6.** Scatter Plot Analysis to Compare Genes Regulated by GA (*oscps1-1* background) and GID1 in Anther.

Axes show the  $\text{log}_2$  value of the ratios of signal intensities observed in the indicated plants.



**A**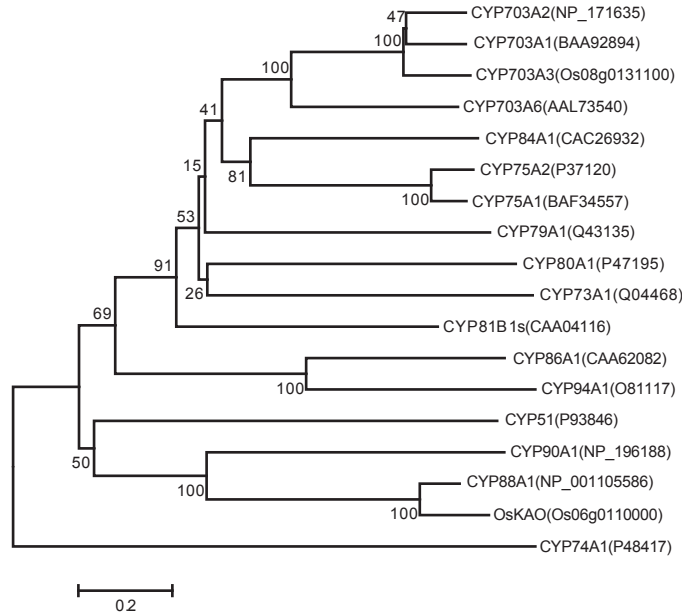**B**

```

CYP703A1 1 MIDFTNYLLVLFPRVYIFYLVDYALIFVVCVYLVSGLVHFSFIEISKQKINRLPFGKQWPI
CYP703A2 1 -----MILVLSLPAVLILNVLWRRLASAKAQRLLPFGPFRWPI
CYP703A3 1 -----MDFPFLSLILCSWIFVWVSWKLNQMRRLPFGPFRWPI
CYP703A6 1 -----MDFPFLSLILCSWIFVWVWRRLNMRRLPFGPFRWPI

CYP703A1 61 VGNLLQLGQLPFRHDMASFCDKYGFLVYLRGNVDAITTDPEHIREILVQDDIFASRFR
CYP703A2 42 LGNLLQLGFLPFRDLASLCDKYGFLVYLRGNVDAITTDPEHIREILVQDDIFASRFR
CYP703A3 40 FGNLLQLGFLPFRHDFARFCIKYGFLVYLRGLTDAITTDPEVIREILVQDDIFASRFR
CYP703A6 40 FGNLLQLGFLPFRHDFARFCIKYGFLVYLRGLTDAITTDPEVIREILVQDDIFASRFR

CYP703A1 121 FLAAVHLLAYGCGDVALAPLGPWKRMRRCMEHLLTKRRLSEFGMHRADAEQSLVEDVWA
CYP703A2 102 FLAAVHLLAYGCGDVALAPLGPWKRMRRCMEHLLTKRRLSEFTTQRAEARYLIRDVFK
CYP703A3 100 FLAAVHLLAYGCGDVALAPLGPWKRMRRCMEHLLTKRRLSEFAAHRADAEHLLCQVWA
CYP703A6 100 FLAAVHLLAYGCGDVALAPLGPWKRMRRCMEHLLTKRRLSEFAAHRADAEHLLCQVWA

CYP703A1 181 KTSKSEIVNLPDILGAFSMNNVTRMLLGGKQVFC-ALSGAGGEAMEFMHITHELFWLLGVI
CYP703A2 162 RSEKSEIVNLPDILGAFSMNNVTRMLLGGKQVFC-PGSLVSEKAGSEFMHITHELFWLLGVI
CYP703A3 160 KTSKSEIVNLPDILGAFSMNNVTRMLLGGKQVFC-LQSGAGGEAMEFMHITHELFWLLGVI
CYP703A6 160 KTSKSEIVNLPDILGAFSMNNVTRMLLGGKQVFC-IQSGAGGEAMEFMHITHELFWLLGVI

CYP703A1 240 YLGDYLPFRWRHDPHGCEKKMRVEKRVDDFHQKIIDEHRRAREAKKS-----GKNVDE--G
CYP703A2 222 YLGDYLPFRWRHDPHGCEKKMRVEKRVDDFHQKIIDEHRRAREAKKS-----KLEDEKNG
CYP703A3 219 YLGDYLPFRWRHDPHGCEKKMRVEKRVDDFHQKIIDEHRRAREAKKS---ASLDDDNKE
CYP703A6 219 YLGDYLPFRWRHDPHGCEKKMRVEKRVDDFHQKIIDEHRRAREAKKTRRSLEDDDDGKE

CYP703A1 289 DMDFVDVLLSLPGEDEGDGNGKQHMDDTEIKALIQDMIAAATDTSVNTNEWMAEVIKRF
CYP703A2 273 DMDFVDVLLSLPGE----NGKQHMDDVEIKALIQDMIAAATDTSVNTNEWMAEVIKRF
CYP703A3 276 DMDFVDVLLSLPGE----NGKEHMDDVEIKALIQDMIAAATDTSVNTNEWMAEVIKRF
CYP703A6 279 DMDFVDVLLSLPGE----NGKEHMDDVEIKALIQDMIAAATDTSVNTNEWMAEVIKRF

CYP703A1 349 NVLNRKIQBEELDIVVGSDRMVESDLVHLKYLRCVVRSEFRMHFAGFPFLIPHESIRDTKIN
CYP703A2 328 RVNRKIQBEELDIVVGSNRMVESDLVHLKYLRCVVRSEFRMHFAGFPFLIPHESVRAATTIN
CYP703A3 331 NVLNRKIQBEELDIVVGRMRVAESDLGQLTYLRCVVRSEFRMHFAGFPFLIPHESLRPTTIM
CYP703A6 334 NVLNRKIQBEELDIVVGRMRVAESDLGQLTYLRCVVRSEFRMHFAGFPFLIPHESLRPTTIM

CYP703A1 409 GYIFPARTRVFINTHGLGRNTKIWDNIDFRPERHLPAGEE-SRVEISHGADFKILPFGSA
CYP703A2 388 GYIFPARTRVFINTHGLGRNTKIWDNIDFRPERHLPAGEE-SRVEISHGADFKILPFGSA
CYP703A3 391 GHVIFPARTRVFINTHGLGRNTKIWDNIDFRPERHLPAGEE-SRVEISHGADFKILPFGSA
CYP703A6 394 GHVIFPARTRVFINTHGLGRNTKIWDNIDFRPERHLPAGEE-SRVEISHGADFKILPFGSA

CYP703A1 469 GRRKCPGAPLGVILVLMALARLPHCFDWSPPDGLRPEDIDTIEVYGMTMPKAKPLVAVAT
CYP703A2 447 GRRKCPGAPLGVILVLMALARLPHCFDWSPPDGLRPEDIDTIEVYGMTMPKAKPLVAVAT
CYP703A3 451 GRRKCPGAPLGVILVLMALARLPHCFDWSPPDGLRPEDIDTIEVYGMTMPKAKPLVAVAT
CYP703A6 453 GRRKCPGAPLGVILVLMALARLPHCFDWSPPDGLRPEDIDTIEVYGMTMPKAKPLVAVAT

CYP703A1 528 PRLFDHLVHSIK---
CYP703A2 502 PRLAAHLVY-----
CYP703A3 511 PRLPFDHLYGRHGKQV
CYP703A6 513 PRLPFDHLYGGGSAS-

```

### Supplemental Figure 7. Structure of CYP703A3.

**(A)** Phylogenetic tree of the cytochrome P450 proteins.

CYP703A3 belongs to the same group as CYP703A1, CYP703A2, and CYP703A6, which are involved in lipid metabolism as a lauric acid in-chain hydroxylase. The phylogenetic tree was generated using MEGA 4.0 with the neighbor joining method. Bootstrap values were calculated from 1,000 trials and are shown at each node. The extent of divergence according to the scale (relative units) is shown at bottom.

**(B)** Alignment of the amino acid sequences of CYP703A-family proteins.

The alignment was generated using CLUSTALX 2.0 with default parameters and BoxShade 3.21. Positions of identical and similar sequences are boxed in black and grey, respectively.

**A**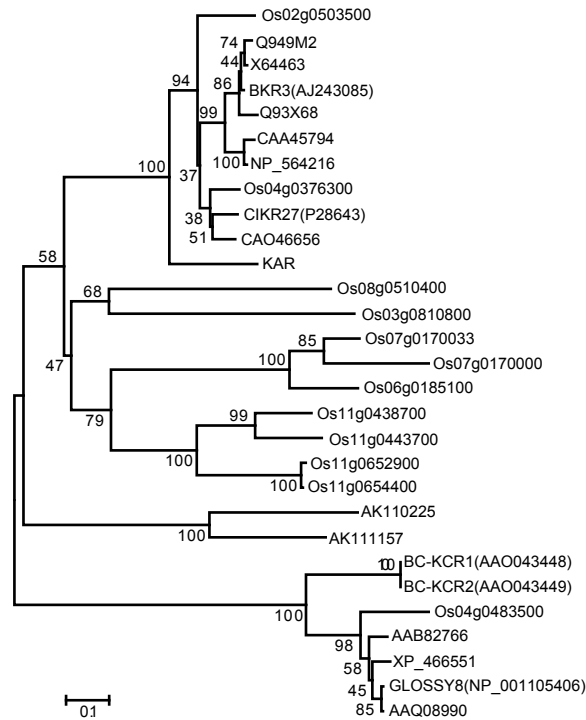**B**

|        |     |                                                                                                                                                                                                                                                                                                                                                    |
|--------|-----|----------------------------------------------------------------------------------------------------------------------------------------------------------------------------------------------------------------------------------------------------------------------------------------------------------------------------------------------------|
| CIKR27 | 1   | <b>M</b> A <b>T</b> A <b>T</b> A <b>A</b> G - C <b>S</b> G <b>A</b> V <b>A</b> L <b>K</b> S <b>L</b> G <b>G</b> R <b>R</b> L <b>C</b> I <b>P</b> O <b>Q</b> L <b>S</b> P <b>V</b> L <b>A</b> G <b>F</b> G <b>S</b> H <b>A</b> A <b>K</b> S <b>F</b> P <b>I</b> L <b>S</b> T <b>R</b> - <b>S</b> I <b>A</b> T <b>S</b> G - I                        |
| BKR3   | 1   | <b>M</b> A <b>T</b> T <b>V</b> A <b>A</b> T <b>K</b> L <b>T</b> S <b>L</b> K <b>A</b> V <b>K</b> K <b>L</b> G <b>F</b> R <b>E</b> I <b>R</b> Q <b>V</b> R <b>Q</b> W <b>T</b> P <b>L</b> Q <b>S</b> ----- <b>S</b> M <b>P</b> H <b>F</b> G <b>S</b> R <b>Q</b> S <b>F</b> A <b>T</b> S <b>T</b> V <b>V</b>                                         |
| KAR    | 1   | --- <b>M</b> A <b>S</b> A <b>A</b> Y <b>Y</b> A <b>G</b> L <b>V</b> A <b>G</b> T <b>P</b> P <b>P</b> P <b>C</b> R <b>P</b> G <b>R</b> L <b>R</b> R <b>C</b> Q <b>P</b> P <b>A</b> N----- <b>N</b> L <b>V</b> S <b>S</b> G <b>R</b> R                                                                                                               |
| CIKR27 | 58  | <b>R</b> A <b>Q</b> V <b>A</b> T <b>A</b> E <b>K</b> - <b>V</b> S <b>A</b> G <b>A</b> G <b>O</b> S <b>V</b> E <b>S</b> P <b>V</b> V <b>I</b> V <b>T</b> G <b>A</b> S <b>R</b> G <b>I</b> G <b>K</b> A <b>I</b> A <b>L</b> S <b>L</b> G <b>K</b> A <b>G</b> C <b>K</b> V <b>L</b> V <b>N</b> Y <b>A</b> R <b>S</b> S <b>K</b> E <b>A</b> E          |
| BKR3   | 53  | <b>K</b> A <b>Q</b> A <b>T</b> A <b>V</b> E <b>Q</b> - <b>S</b> T <b>G</b> E <b>A</b> V <b>P</b> K <b>V</b> E <b>S</b> P <b>V</b> V <b>V</b> V <b>T</b> G <b>A</b> S <b>R</b> G <b>I</b> G <b>K</b> A <b>I</b> A <b>L</b> S <b>L</b> G <b>K</b> A <b>G</b> C <b>K</b> V <b>L</b> V <b>N</b> Y <b>A</b> R <b>S</b> A <b>K</b> E <b>A</b> E          |
| KAR    | 41  | <b>S</b> H <b>Q</b> A <b>I</b> R <b>V</b> T <b>N</b> G <b>V</b> N <b>M</b> D <b>G</b> R <b>A</b> K <b>L</b> A <b>A</b> P <b>V</b> A <b>V</b> V <b>T</b> G <b>A</b> S <b>R</b> G <b>I</b> G <b>R</b> A <b>I</b> A <b>V</b> A <b>L</b> G <b>K</b> A <b>G</b> C <b>K</b> V <b>I</b> V <b>N</b> Y <b>A</b> K <b>S</b> G <b>M</b> E <b>A</b> E          |
| CIKR27 | 117 | <b>E</b> V <b>S</b> K <b>E</b> I <b>E</b> I <b>A</b> F <b>G</b> G <b>Q</b> A <b>L</b> T <b>F</b> G <b>G</b> D <b>V</b> S <b>K</b> E <b>E</b> D <b>V</b> E <b>A</b> M <b>I</b> K <b>T</b> A <b>V</b> D <b>A</b> W <b>G</b> T <b>V</b> D <b>I</b> L <b>V</b> N <b>N</b> A <b>G</b> I <b>T</b> R <b>D</b> G <b>L</b> L <b>M</b> R <b>M</b> K <b>K</b> |
| BKR3   | 112 | <b>E</b> V <b>S</b> K <b>Q</b> I <b>E</b> I <b>A</b> Y <b>G</b> G <b>Q</b> A <b>I</b> T <b>F</b> G <b>G</b> D <b>V</b> S <b>K</b> E <b>A</b> D <b>V</b> E <b>A</b> M <b>M</b> K <b>T</b> A <b>I</b> D <b>A</b> W <b>G</b> T <b>I</b> D <b>V</b> V <b>V</b> N <b>N</b> A <b>G</b> I <b>T</b> R <b>D</b> T <b>L</b> L <b>I</b> R <b>M</b> K <b>K</b> |
| KAR    | 101 | <b>E</b> V <b>C</b> R <b>E</b> I <b>E</b> I <b>E</b> S <b>G</b> G <b>T</b> A <b>I</b> T <b>F</b> S <b>A</b> D <b>V</b> S <b>I</b> E <b>A</b> E <b>V</b> E <b>S</b> M <b>M</b> R <b>A</b> A <b>I</b> D <b>T</b> W <b>G</b> T <b>L</b> D <b>V</b> L <b>V</b> N <b>N</b> A <b>G</b> I <b>T</b> R <b>D</b> A <b>L</b> L <b>M</b> R <b>M</b> K <b>R</b> |
| CIKR27 | 177 | <b>S</b> Q <b>W</b> Q <b>E</b> V <b>I</b> D <b>L</b> N <b>L</b> T <b>G</b> V <b>F</b> L <b>C</b> T <b>Q</b> A <b>A</b> A <b>K</b> I <b>M</b> M <b>K</b> K <b>K</b> G <b>R</b> I <b>I</b> N <b>I</b> A <b>S</b> V <b>V</b> G <b>L</b> V <b>G</b> N <b>A</b> G <b>Q</b> A <b>N</b> Y <b>S</b> A <b>A</b> K <b>A</b> G <b>V</b> I <b>G</b>            |
| BKR3   | 172 | <b>S</b> Q <b>W</b> D <b>E</b> V <b>I</b> D <b>L</b> N <b>L</b> T <b>G</b> V <b>F</b> L <b>C</b> T <b>Q</b> A <b>A</b> T <b>K</b> I <b>M</b> M <b>K</b> K <b>R</b> K <b>G</b> R <b>I</b> I <b>N</b> I <b>A</b> S <b>V</b> V <b>G</b> L <b>I</b> G <b>N</b> I <b>G</b> Q <b>A</b> N <b>Y</b> A <b>A</b> A <b>K</b> A <b>G</b> V <b>I</b> G          |
| KAR    | 161 | <b>T</b> Q <b>W</b> Q <b>E</b> V <b>V</b> D <b>V</b> N <b>L</b> T <b>G</b> V <b>V</b> L <b>C</b> A <b>Q</b> A <b>A</b> A <b>G</b> V <b>M</b> M <b>M</b> K <b>K</b> K <b>G</b> R <b>I</b> I <b>N</b> I <b>T</b> S <b>V</b> S <b>G</b> I <b>I</b> G <b>N</b> I <b>G</b> Q <b>A</b> N <b>Y</b> C <b>A</b> A <b>K</b> A <b>G</b> V <b>I</b> G          |
| CIKR27 | 237 | <b>F</b> T <b>K</b> T <b>V</b> A <b>R</b> E <b>Y</b> A <b>S</b> R <b>N</b> I <b>N</b> V <b>N</b> A <b>V</b> A <b>P</b> G <b>F</b> I <b>S</b> <b>S</b> D <b>M</b> T <b>S</b> K <b>L</b> G <b>D</b> D <b>I</b> N <b>K</b> K <b>I</b> L <b>E</b> T <b>I</b> P <b>L</b> G <b>R</b> Y <b>G</b> Q <b>P</b> E <b>E</b> V <b>A</b> G <b>L</b> V <b>E</b>   |
| BKR3   | 232 | <b>F</b> S <b>K</b> T <b>A</b> A <b>R</b> E <b>G</b> A <b>S</b> R <b>N</b> I <b>N</b> V <b>V</b> C <b>P</b> G <b>F</b> I <b>A</b> S <b>D</b> M <b>T</b> A <b>K</b> L <b>G</b> E <b>D</b> M <b>E</b> K <b>K</b> I <b>L</b> G <b>T</b> I <b>P</b> L <b>G</b> R <b>Y</b> G <b>Q</b> P <b>E</b> D <b>V</b> A <b>G</b> L <b>V</b> E                     |
| KAR    | 221 | <b>L</b> T <b>K</b> A <b>M</b> A <b>R</b> E <b>Y</b> G <b>S</b> R <b>N</b> I <b>N</b> V <b>N</b> A <b>V</b> A <b>P</b> G <b>W</b> V <b>T</b> <b>S</b> N <b>M</b> T <b>A</b> K <b>L</b> G <b>D</b> N <b>V</b> E <b>Q</b> K <b>A</b> L <b>E</b> T <b>I</b> P <b>L</b> G <b>R</b> F <b>G</b> K <b>P</b> E <b>E</b> I <b>A</b> G <b>L</b> V <b>E</b>   |
| CIKR27 | 297 | <b>F</b> L <b>A</b> I <b>N</b> P <b>A</b> S <b>S</b> Y <b>V</b> T <b>G</b> Q <b>V</b> F <b>T</b> I <b>D</b> G <b>G</b> M <b>T</b> M                                                                                                                                                                                                                |
| BKR3   | 292 | <b>F</b> L <b>A</b> L <b>S</b> P <b>A</b> A <b>S</b> Y <b>I</b> T <b>G</b> Q <b>A</b> F <b>T</b> I <b>D</b> G <b>G</b> I <b>A</b> I                                                                                                                                                                                                                |
| KAR    | 281 | <b>F</b> L <b>A</b> V <b>H</b> P <b>A</b> A <b>S</b> Y <b>I</b> T <b>G</b> Q <b>V</b> L <b>P</b> V <b>D</b> G <b>G</b> L <b>S</b> I                                                                                                                                                                                                                |

**Supplemental Figure 8. Structure of KAR.****(A)** Phylogenetic tree of the KAR family proteins.

The phylogenetic tree was generated using MEGA 4.0 with the neighbor joining method.

Bootstrap values were calculated from 1,000 trials and are shown at each node. The extent of divergence according to the scale (relative units) is shown at bottom.

**(B)** The alignment of the amino acid sequences for CIKR27, BKR3, and KAR.

The alignment was generated using CLUSTALX 2.0 with default parameters and BoxShade 3.21. Positions of identical and similar sequences are boxed in black and grey, respectively.

Asterisks show the conserved catalytic triad for short-chain-alcohol reductase family.



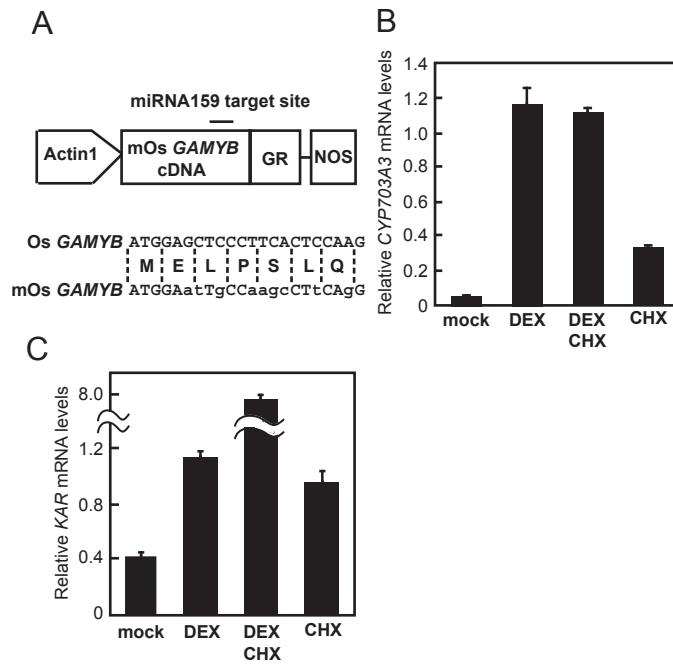

**Supplemental Figure 9.** Expression Analysis for *CYP703A3* and *KAR* Genes Using the DEX-Inducible mOs *GAMYB-GR* Transgenic *gamyb-2* Plant.

**(A)** *ProAct1:mOs GAMYB-GR* construct. mOs *GAMYB-GR* fusion gene was driven by the *Actin1* promoter. mOs *GAMYB-GR* was consisted of the full-length Os *GAMYB* cDNA with nine synonymous nucleotide substitutions at the miRNA159 target site (lower letters in the bottom sequence), and the rat glucocorticoid receptor (GR).

**(B)** and **(C)** Real-time RT-PCR analysis of *CYP703A3* **(B)** and *KAR* **(C)** mRNAs. Total RNAs were isolated from the *gamyb-2* flowers carrying *ProAct1:mOs GAMYB-GR* treated with or without 10  $\mu$ M DEX and 10  $\mu$ M CHX for 4 h. The level of *CYP703A3* and *KAR* mRNA was normalized to *ACTIN1*. Data represent averages of three biological replicates, with error bars representing SD.

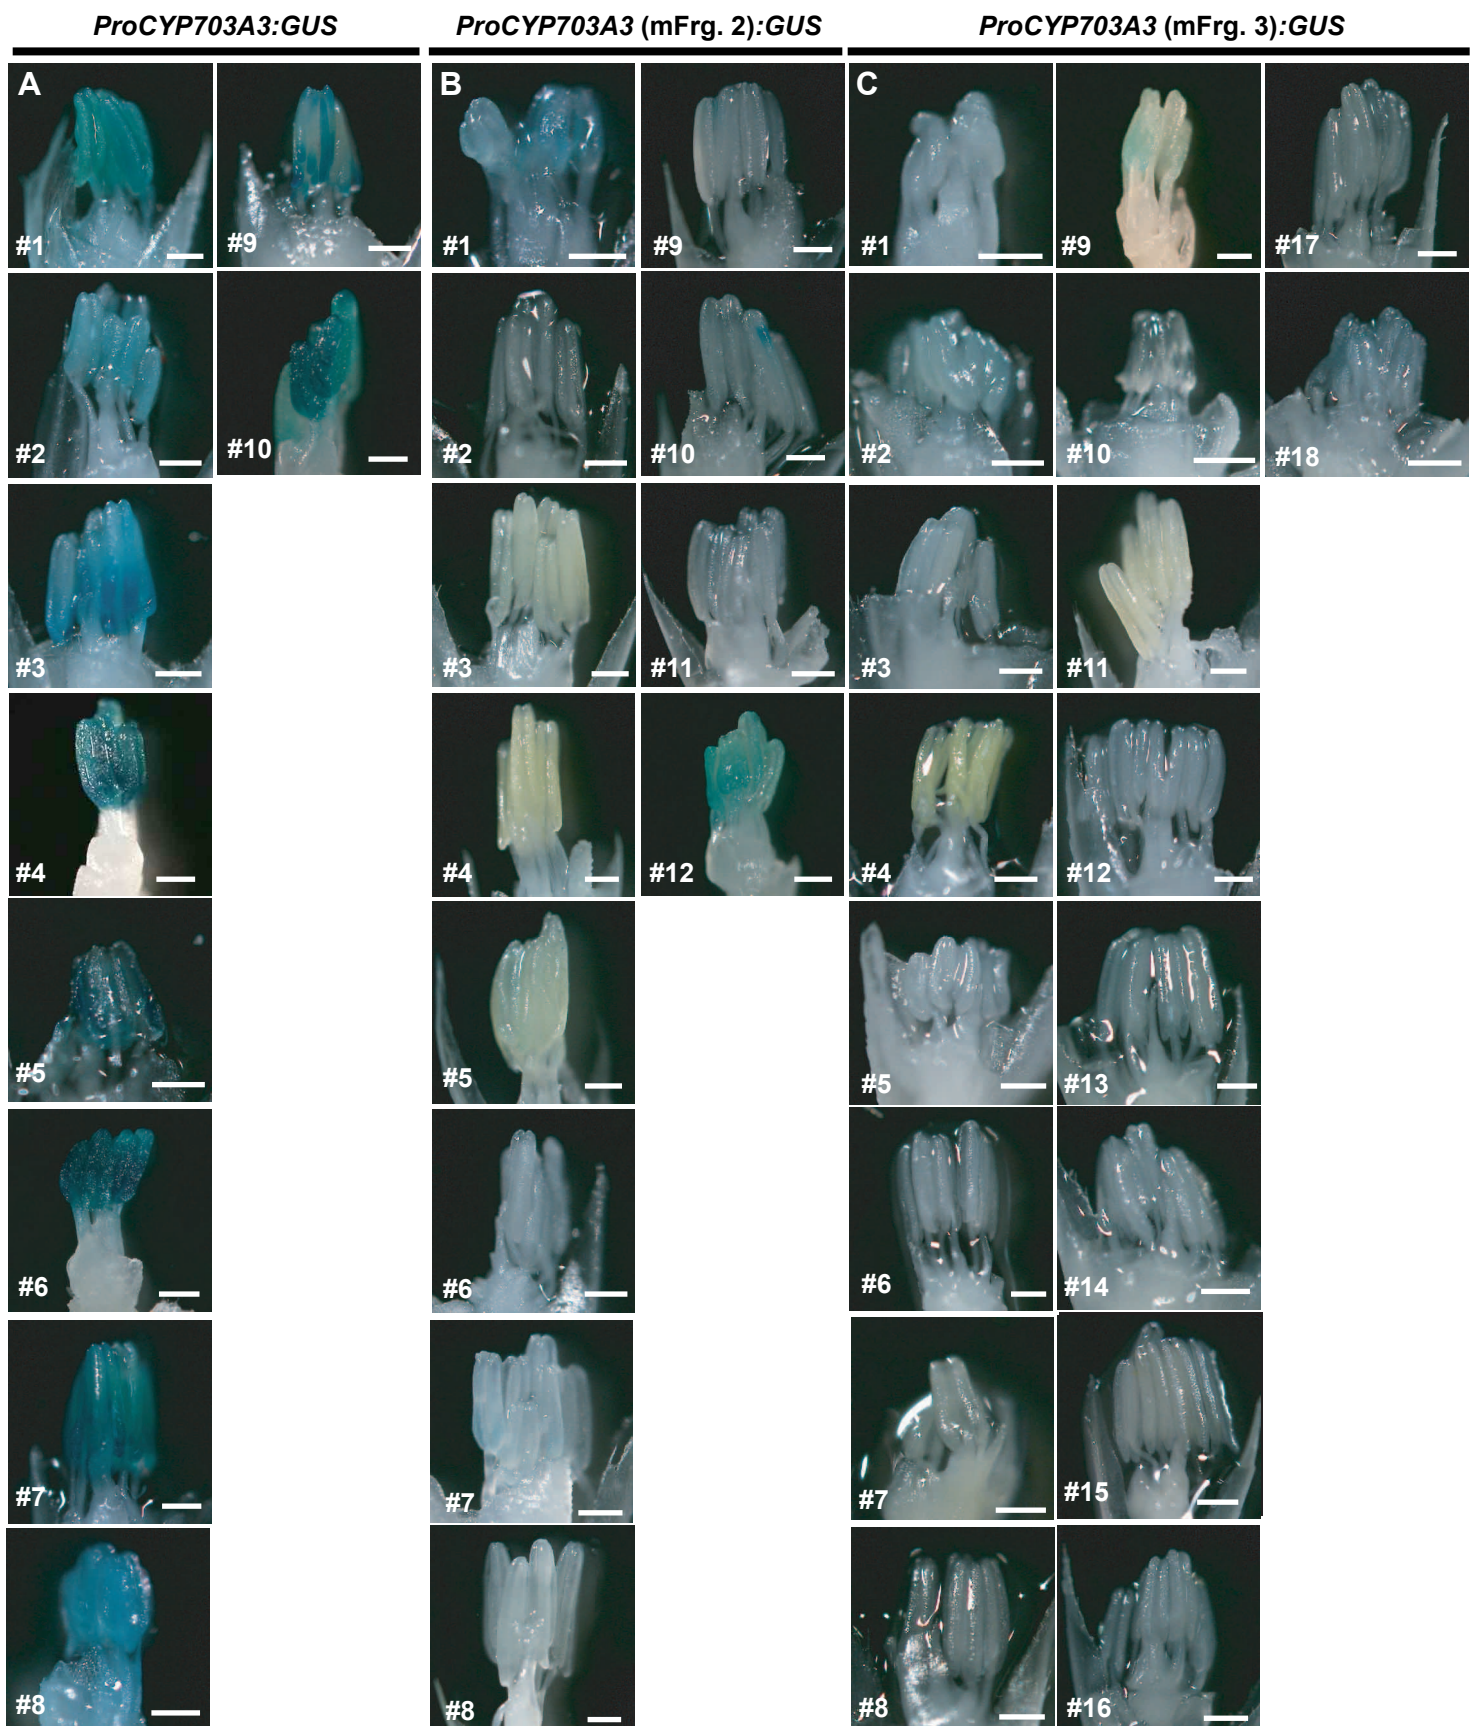

**Supplemental Figure 10.** GUS Activity of Stamens in All Transgenic Plants Carrying the Native or Mutagenized *ProCYP703A3*:GUS construct.

(A) Stamens from 10  $T_0$  transgenic lines with the *ProCYP703A3*:GUS construct.

(B) Stamens from 12  $T_0$  transgenic lines with the *ProCYP703A3* (mFrg. 2):GUS construct.

(C) Stamens from 18  $T_0$  transgenic lines with the *ProCYP703A3* (mFrg. 3):GUS construct.

Bars = 300  $\mu$ m.

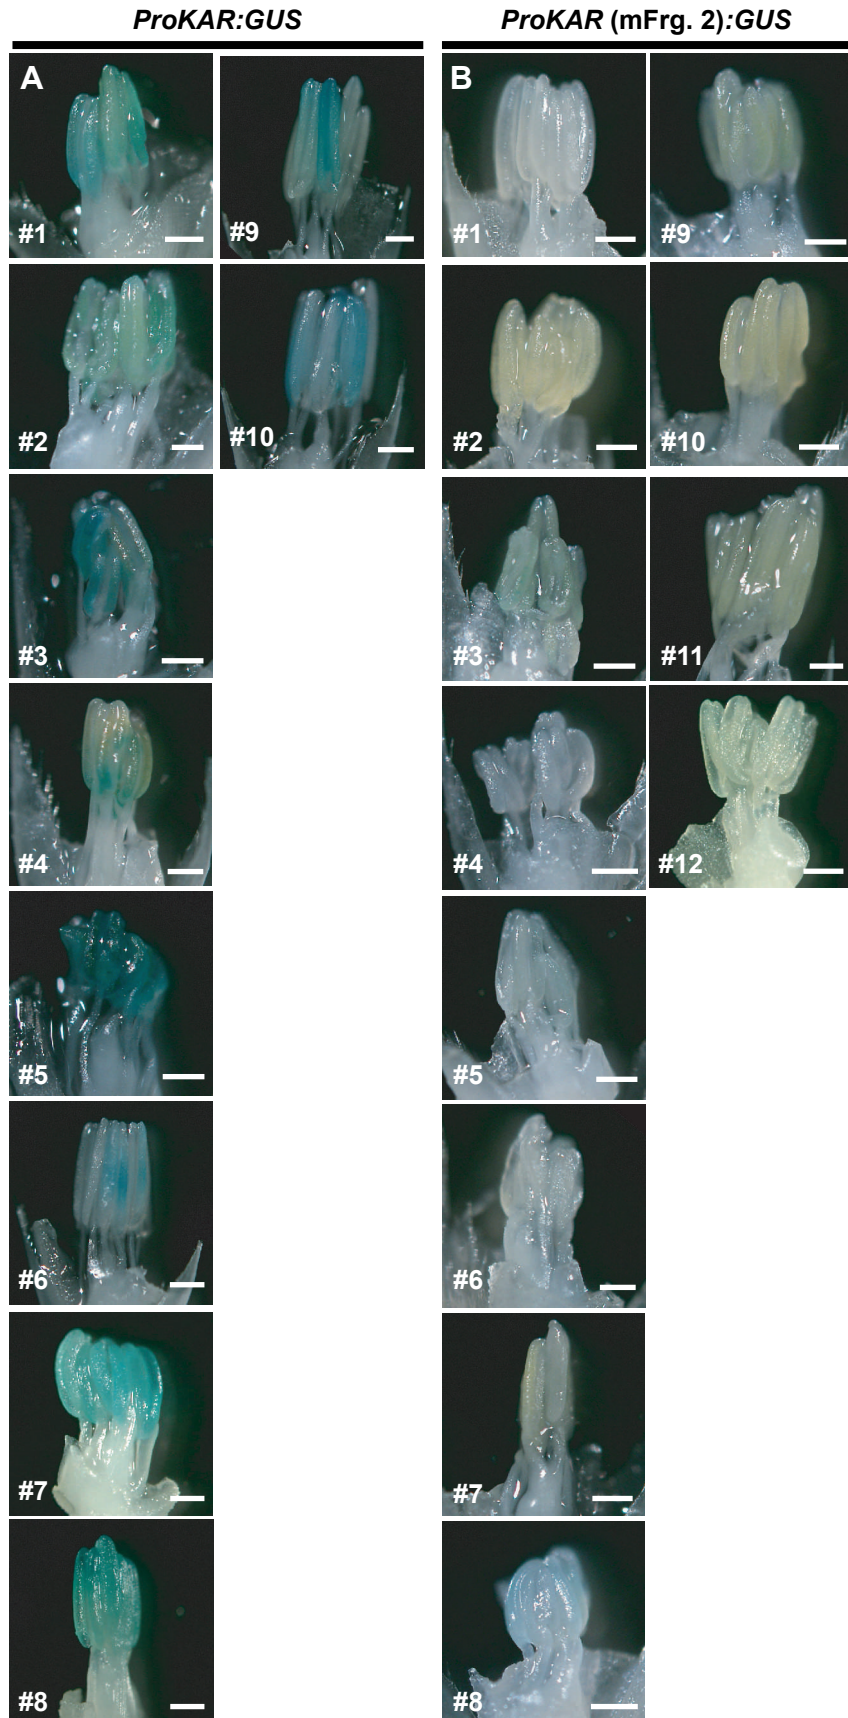

**Supplemental Figure 11.** GUS Activity of Stamens in All Transgenic Plants Carrying the Native or Mutagenized *ProKAR:GUS* Construct.

**(A)** Stamens from 10  $T_0$  transgenic lines with the *ProKAR:GUS* construct.

**(B)** Stamens from 12  $T_0$  transgenic lines with the *ProKAR (mFrg. 2):GUS* construct.

Bars = 300  $\mu\text{m}$ .



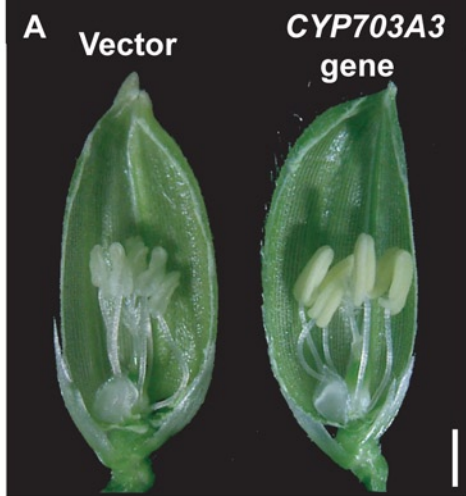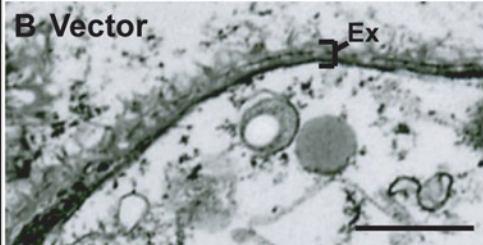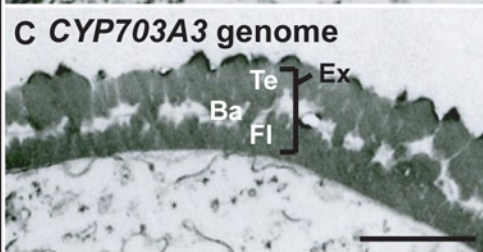

**Supplemental Figure 12.** Complementation Test of *cyp703a3-1*.

**(A)** Flowers of *cyp703a3-1* transgenic lines carrying empty vector or *CYP703A3* gene. Bar = 1 cm.

**(B)** and **(C)** Exine layers of *cyp703a3-1* transgenic lines carrying vector **(B)** or *CYP703A3* gene **(C)**. Ex, exine; Ba, bacula; Te, tectum; Fl, foot layer.

Bars = 1  $\mu$ m.

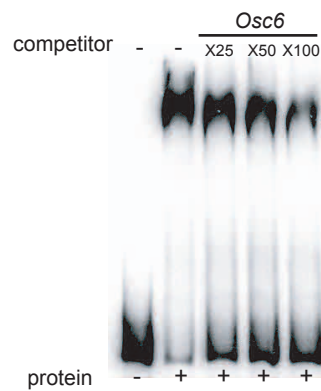

**Supplemental Figure 13.** Competitive Gel-Shift Assay with *Osc6* Promoter Region. Interaction between Os GAMYB and  $^{32}\text{P}$ -labelled *RAMy1A* probe (-380 to -85) was efficiently competed by the fragment containing the GAMYB binding-like motif from *Osc6*. Competition experiments were performed using increasing molar amounts (X25, X50, X100) of the indicated unlabelled fragment; Lane 3 to 5, *Osc6* (-315 to -247).

**Supplemental Table 1. PCR Primers Used in This Study**

| Gene name or vector name | Primer name                        | Sequence (5'-3')                                                | Used for                                                       |
|--------------------------|------------------------------------|-----------------------------------------------------------------|----------------------------------------------------------------|
| TOS17                    | LTR4A                              | ACTGTATAGTTGGCCCATGTCCAG                                        | genotyping for <i>cyp703a3-1</i> and <i>gamyb-2</i>            |
| CYP703A3                 | AK106843-19U<br>AK106843-19L       | GTCATCCGTGAGATACTCATC<br>ACCTCTCTGAGATTCACAGG                   | genotyping of <i>cyp703a3-1</i>                                |
| OsGAMYB                  | OsGAMYB-12U<br>OsGAMYB-11L         | TCAGCTCTCCAAAGTTTCCC<br>CAGGTTCCATATTTAGGCCCC                   | genotyping of <i>gamyb-2</i>                                   |
| CYP703A3                 | CYP703A3-SacIU<br>CYP703A3-SmaIL   | GAGCTCCTAAGTGCAGTGCGGTGGTT<br>CCCGGGGACACCGATGATGTGTGCGGTGG     | ProCYP703A3::GUS construct                                     |
| KAR                      | KAR-SpeIU<br>KAR-EcoRVL            | ACTAGTGCGGAAGTGAATAACATGTAC<br>GATATCGAATCCATGTTCACTCCATTGG     | ProKAR::GUS construct                                          |
| GUS                      | GUS-ClaIU<br>GUS-ClaIL             | ATCGATATGTTACGCTCTGTAGAAAC<br>ATCGATTCAITGTTTGCCCTCCCTGCTG      | OsGAMYB-GUS construct                                          |
| CYP703A3                 | CYP703A3-mMYB1U<br>CYP703A3-mMYB1L | TGTTACGAGAGATGTTGAACAA<br>CATCTCTCGTAACATCATATAATA              | ProCYP703A3 (mFrg. 2) ::GUS construct                          |
| CYP703A3                 | CYP703A3-mMYB2U<br>CYP703A3-mMYB2L | TCTGTTCCGAATTCGCTTCAAC<br>ATTGCGAACAGAAATTGACTGG                | ProCYP703A3 (mFrg. 3) ::GUS construct                          |
| KAR                      | KAR-mMYBU<br>KAR-mMYBL             | TTCACGAACACACTCTTACTATC<br>GTGTGTTTCGTAATGGTTAAACATG            | ProKAR (mFrg. 2) ::GUS construct                               |
| Lipid transporter        | AK119794-RTU<br>AK119794-RTL       | GCCATCAGCATCATGAACAG<br>AACGAGACACGAAGACAACG                    | semiquantitative RT-PCR                                        |
| OsMale Sterile 2         | OsMS2-RTU<br>OsMS2-RTL             | GCAGCATCTACCAGCCCTAC<br>TCCGCAATATCTTCTCGATG                    | semiquantitative RT-PCR                                        |
| CYP703A3                 | AK106843-RTU<br>AK106843-RTL       | GCTAGGGAGGCCAAGAAGAG<br>TTGGTCACCGATGATGTGTC                    | semiquantitative RT-PCR and real-time PCR                      |
| KAR                      | AK109188-RTU<br>AK109188-RTL       | ACATGACCGCAAAACTAGGC<br>ATTGACAGGCCACCATCAAC                    | semiquantitative RT-PCR                                        |
| Aspartic protease        | AK105952-RTU<br>AK105952-RTL       | GGATGGTGTTCACACTTCCAG<br>TTTTTCAGTTGACACGTGGTG                  | semiquantitative RT-PCR                                        |
| Meiotic serine protease  | AK106823-RTU<br>AK106823-RTL       | TCATCACTGACCGTCTCTCCG<br>CCGAACTTGGTGACTCTCC                    | semiquantitative RT-PCR                                        |
| OsActin1                 | Actin1-1<br>Actin1-2               | CATCTTGGCATCTCTCAGCAC<br>AACTTGTCCACGCTAATGAA                   | real-time PCR                                                  |
| OsActin1                 | Actin1-RTU<br>Actin1-RTL           | TCCATCTTGGCATCTCTCAG<br>GTACCCTCATCAGGCATCTG                    | semiquantitative RT-PCR                                        |
| Lipid transporter        | AK119794-comU<br>AK119794-comL     | AATCATAACCGATTTCAATAG<br>CGGGCCCGGTGTAACAAAC                    | DNA fragment of <i>lipid transporter</i> promoter region       |
| OsMale Sterility 2       | AK121254-comU<br>AK121254-comL     | TATACGTCATTTTTTTTACC<br>GTTCCCTGGGGCCGCCAAAG                    | DNA fragment of <i>OsMale Sterility 2</i> promoter region      |
| CYP703A3                 | AK106843-com1U<br>AK106843-com3L   | GAAGCCAGTTCATGAGTCATG<br>CCATGAGCATAAGATGATGG                   | DNA fragment of CYP703A3 promoter region                       |
| KAR                      | AK109188-com1U<br>AK109188-com2L   | CGGTTGGTGTACCAACCCGG<br>GTTTTCTTACCGTATGGGATC                   | DNA fragment of KAR promoter region                            |
| Aspartic protease        | AK105952-comU<br>AK105952-comL     | TCCCCTTCGATTATTGTTAC<br>GCGAAAGCTGTGCACGAAAG                    | DNA fragment of <i>Aspartic protease</i> promoter region       |
| Meiotic serine protease  | AK106823-comU<br>AK106823-comL     | GATTCTGTCCATGTAGATTCA<br>CTATCTCCATGGGAGCTTCG                   | DNA fragment of <i>Meiotic serine protease</i> promoter region |
| RAmy1A                   | RAmy1A-comU<br>RAmy1A-comL         | AAATAGTTAATACTCAATTA<br>TGGAGGCCTGGCTGGGCTTG                    | DNA fragment of <i>RAmy1A</i> promoter region                  |
| CYP703A3                 | AK106843-Frg1U<br>AK106843-Frg1L   | GAAGCCAGTTCATGAGTCATG<br>CAATGTGCTCAGTCAATTC                    | DNA fragment (Frg. 1) of CYP703A3 promoter region              |
| CYP703A3                 | AK106843-Frg2U<br>AK106843-Frg2L   | GAATTGCACTGAGCACATTG<br>CATGATTCTTGTGCTGATC                     | DNA fragment (Frg. 2) of CYP703A3 promoter region              |
| CYP703A3                 | AK106843-Frg3U<br>AK106843-Frg3L   | GATCAGCACAAGAATCATG<br>CCATGAGCATAAGATGATGG                     | DNA fragment (Frg. 3) of CYP703A3 promoter region              |
| KAR                      | AK109188-Frg.1U<br>AK109188-Frg.1L | CGGTTGGTGTAAACACCCGG<br>CTGAATGGTTAAACATGCAG                    | DNA fragment (Frg.1) of KAR promoter region                    |
| KAR                      | AK109188-Frg.2U<br>AK109188-Frg.2L | CTGCATGTTTAAACCATTGAG<br>GTTTTCTTACCGTATGGGATC                  | DNA fragment (Frg.2) of KAR promoter region                    |
| Osc6                     | AK064672-comU<br>AK064672-comL     | TAAACATGTGCTAAAAAGTC<br>ATTTTCAACAACATACTCCCTC                  | DNA fragment of <i>Osc6</i> promoter region                    |
| GAMYB                    | GAMYB-XbaIU<br>GAMYB-SmaIL         | TCTAGAATGTATCGGGTGAAGAGCG<br>CCCGGGTTTGAATCTGACATTTAC           | ProAct1:mOs GAMYB-GR construct                                 |
| GAMYB                    | GAMYB-mRNA159U<br>GAMYB-mRNA159L   | ATGGAATGCCAAGCCTTCAGGATACTGAAT<br>CCTGAAGGCTTGGCAATTCATCTTCAAAG | ProAct1:mOs GAMYB-GR construct                                 |
| pCR4 Blunt-TOPO vector   | M13F<br>M13R                       | GTAACACGACGGCCAG<br>CAGGAAACAGCTATGAC                           | Sequencing and amplification                                   |
